# Supplementary material
Source: PubMed Central journal article supplement (PMC11072690)

**Figure S1**

**A**

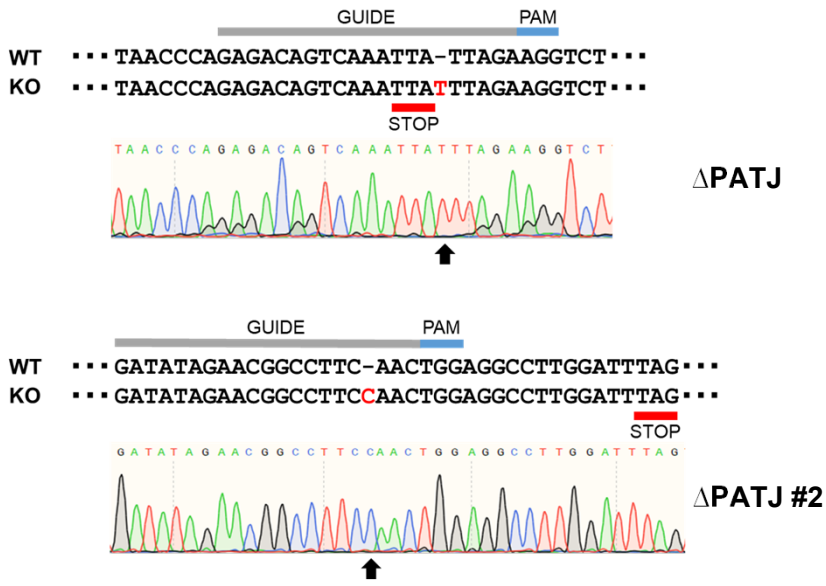

**B**

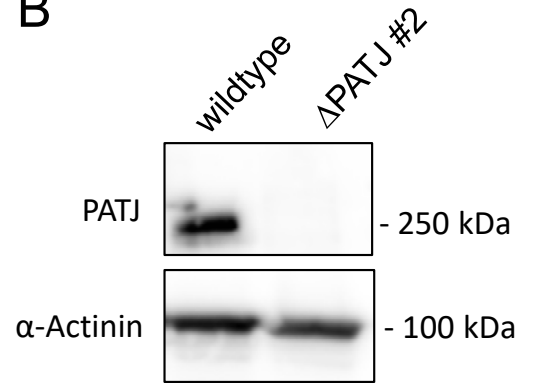

**C**

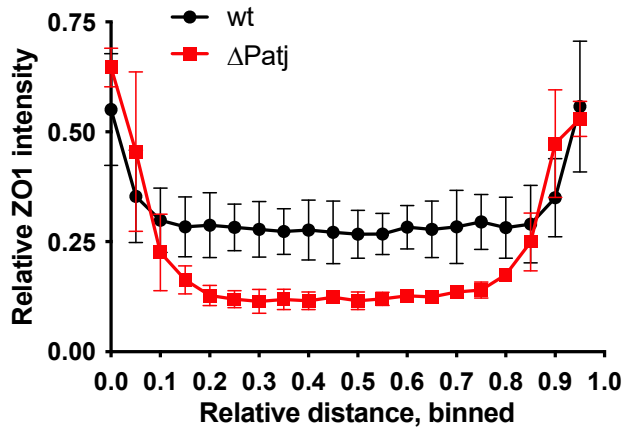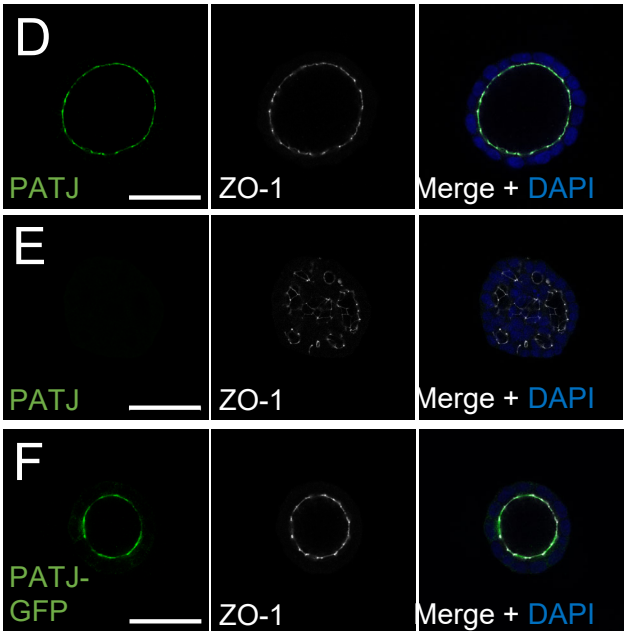

Supplement: 18_2023_4994_MOESM3_ESM.pdf [file 18_2023_4994_MOESM3_ESM.pdf]
