# Supplementary material
Source: PubMed Central journal article supplement (PMC11072690)

**Figure S2**

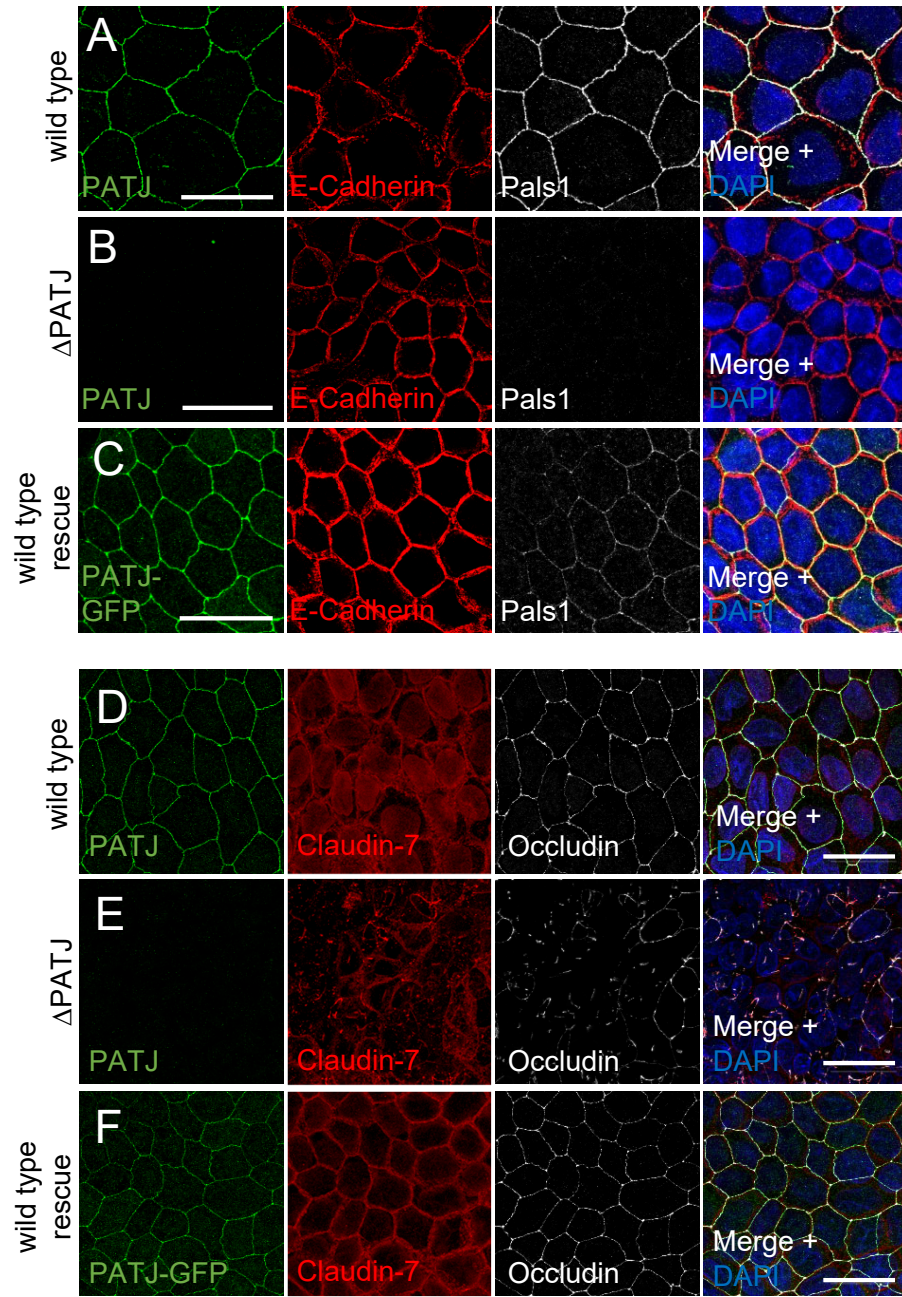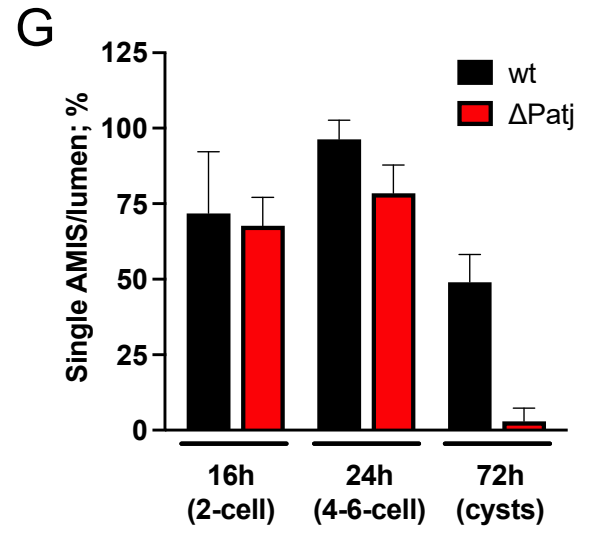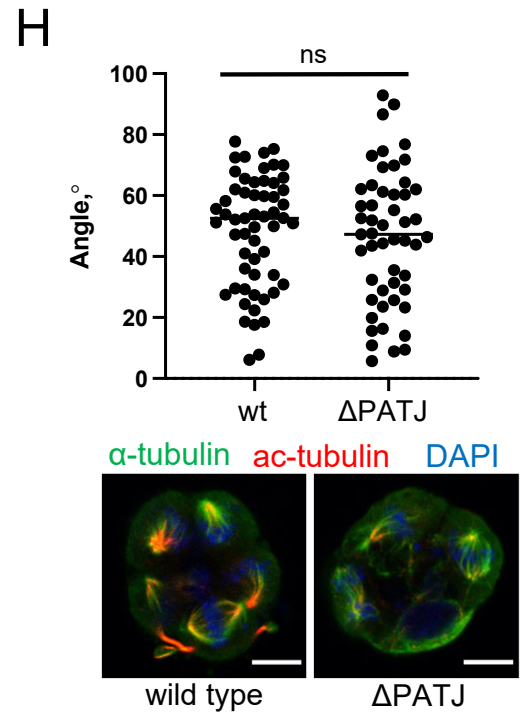

Supplement: 18_2023_4994_MOESM4_ESM.pdf [file 18_2023_4994_MOESM4_ESM.pdf]
