# Supplementary material
Source: PubMed Central journal article supplement (PMC11072690)

# Supplementary Figure 3

## A

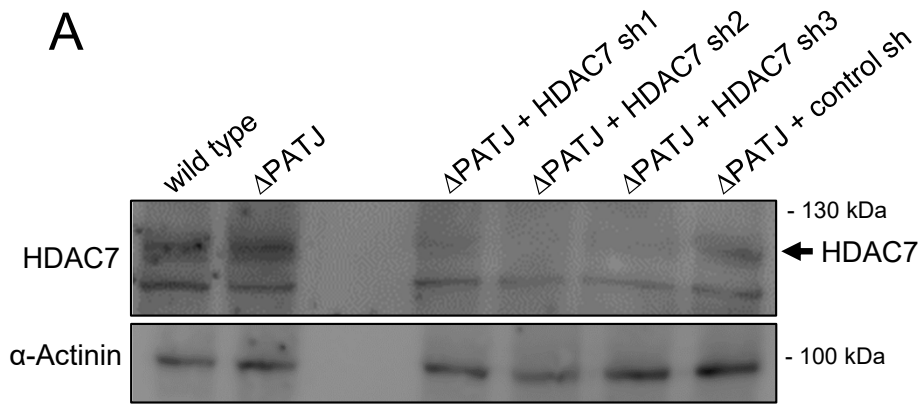

## B

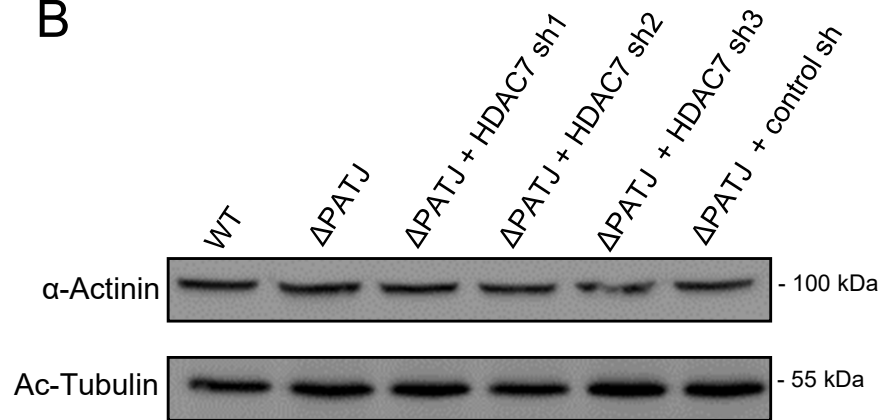

Supplement: 18_2023_4994_MOESM5_ESM.pdf [file 18_2023_4994_MOESM5_ESM.pdf]
