# Supplementary material
Source: PubMed Central journal article supplement (PMC11072690)

# Figure S4

cell adhesion  
0007155

cytoskeletal organization  
0044782

vesicle mediated transport  
0016192

ECM organization  
0030198

protein localization to  
plasma membrane  
0044782

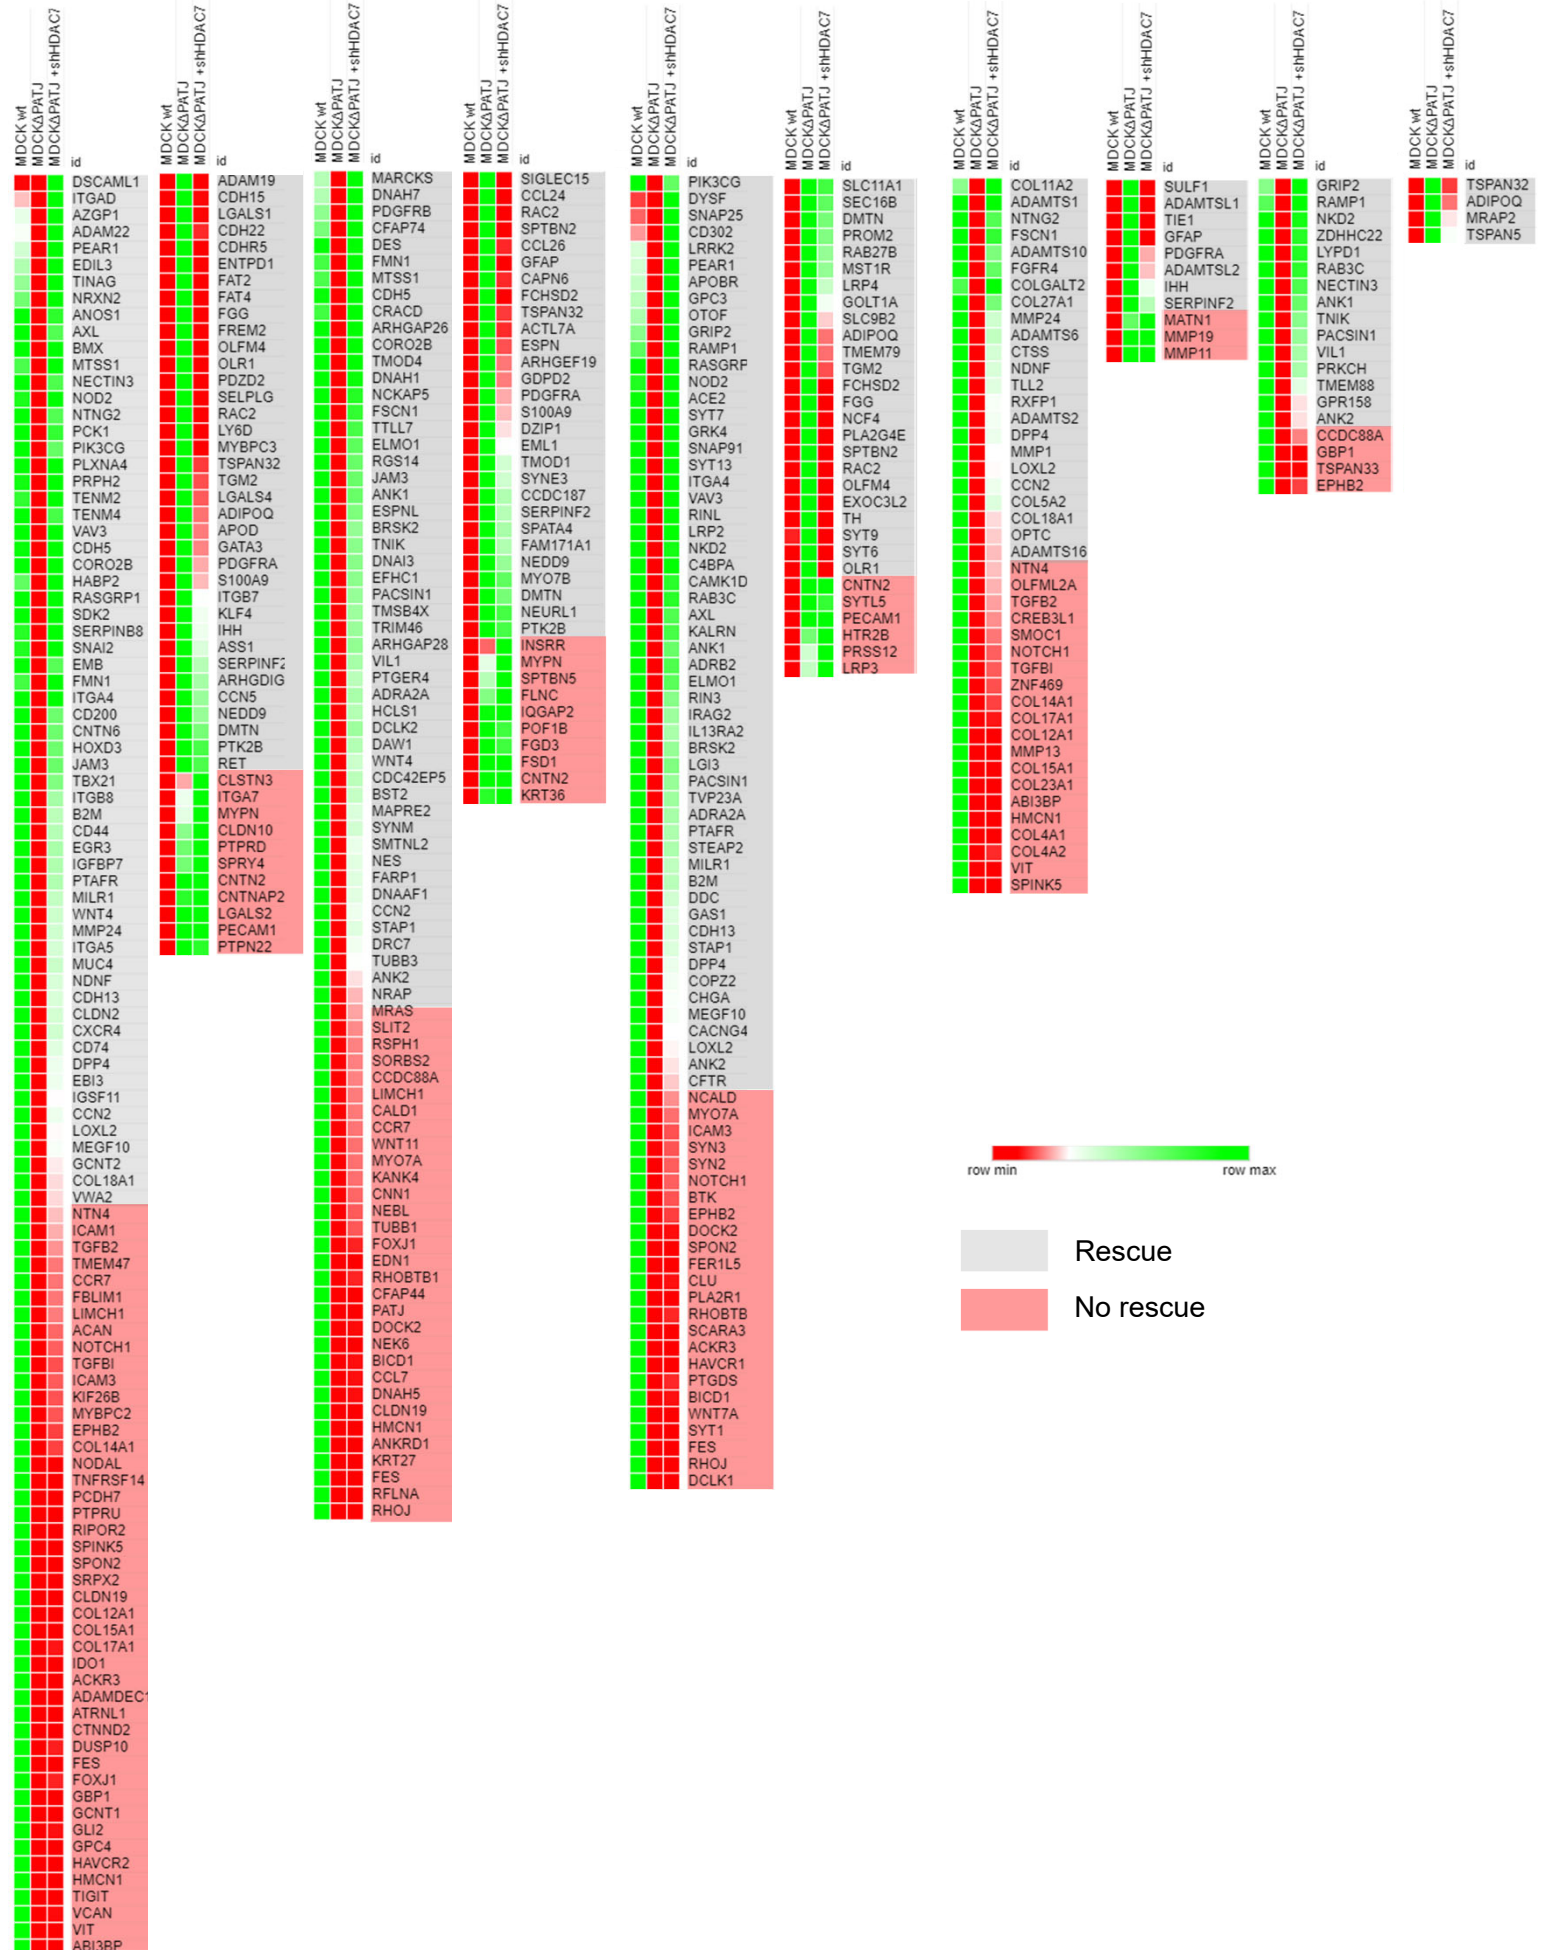

Supplement: 18_2023_4994_MOESM6_ESM.pdf [file 18_2023_4994_MOESM6_ESM.pdf]
